1 **Antigen self-anchoring onto bacteriophage T5 capsid-like particles for vaccine design**

2

3 Emeline Vernhes<sup>§1</sup>, Linda Larbi Chérif <sup>§2</sup>, Nicolas Ducrot<sup>1</sup>, Malika Ouldali<sup>1</sup>, Lena Zig<sup>2</sup>, N'diaye Sidibe<sup>2</sup>,  
4 Sylviane Hoos<sup>3</sup>, Luis Ramirez-Chamorro<sup>1</sup>, Madalena Renouard<sup>1</sup>, Ombeline Rossier<sup>1</sup>, Patrick England<sup>3</sup>,  
5 Guy Schoehn<sup>4</sup>, Pascale Boulanger<sup>1\*</sup> & Karim Benihoud<sup>2\*</sup>

6

7 **1** Université Paris-Saclay, CEA, CNRS, Institute for Integrative Biology of the Cell (I2BC), 91198 Gif-sur-  
8 Yvette, France

9 **2** Université Paris-Saclay, Gustave Roussy, CNRS, Metabolic and systemic aspects of oncogenesis for  
10 new therapeutic approaches (METSU), 94805 Villejuif, France

11 **3** Institut Pasteur, Biophysique Moléculaire, CNRS UMR 3528, Paris, France

12 **4** Univ. Grenoble Alpes, CNRS, CEA, IBS, F-38000 Grenoble, France.

13

14 **§** These authors contributed equally to this study

15 **\* Corresponding authors:**

16 pascale.boulanger@i2bc.paris-saclay.fr

17 karim.benihoud@gustaveroussy.fr

18

19 **Short title:** T5-based capsid-like particle vaccine

20 **Key words:** bacteriophage T5, capsid, decoration protein, protein display, antigen, vaccine

21

22 **Abstract**

23 The promises of vaccines based on virus-like particles stimulate demand for universal non-infectious  
24 virus-like platforms that can be efficiently grafted with large antigens. Here we harnessed the  
25 modularity and extreme affinity of the decoration protein pb10 for the capsid of bacteriophage T5.  
26 SPR experiments demonstrated that pb10 fused to mCherry or to the model antigen ovalbumin (Ova)  
27 retained picomolar affinity for DNA-free T5 capsid-like particles (T5-CLPs), while cryo-EM studies  
28 attested to the full occupancy of the 120 capsid binding sites. Mice immunisation with CLP-bound  
29 pb10-Ova chimeras elicited strong long-lasting anti-Ova humoral responses involving a large panel of  
30 isotypes, as well as CD8<sup>+</sup> T cell responses, without any extrinsic adjuvant. Therefore, T5-CLP  
31 constitutes the first DNA-free bacteriophage capsid able to irreversibly display a regular array of large  
32 antigens through highly efficient chemical-free anchoring. Its ability to elicit robust immune  
33 responses paves the way for further development of this novel vaccination platform.

34

## 35 Introduction

36 Tackling infectious endemic diseases and emerging pandemics requires new vaccines providing  
37 maximum safety, tolerability and immunogenicity. Virus-Like Particles (VLPs) offer great potential for  
38 targeted antigen (Ag) delivery and meet these requirements. They self-assemble into non-infectious  
39 particles mimicking the real virus and constitute multivalent Ag-display platforms. Their nanoscale  
40 size combined with the multimerization of the Ag on their repetitive surface geometry play a major  
41 role in their ability to trigger potent immune responses<sup>1-3</sup>. Currently licensed VLP-based vaccines  
42 targeting Human Papillomavirus (HPV)<sup>4</sup> or Hepatitis B virus (HBV)<sup>5</sup> rely on viral proteins carrying their  
43 own Ag. Yet, the need to diversify VLP-vaccines open the quest for universal virus-like scaffolds able  
44 to display heterologous Ags. Viruses infecting bacteria, or bacteriophages, have been proposed as  
45 versatile and efficient Ag-nanocarriers for mounting immune responses against different Ags<sup>6</sup>. Most  
46 of them enclose their genome in an icosahedral capsid that constitutes a highly stable platform for  
47 Ag-display. During the last decade, several infectious phage particles were used for vaccination assays  
48 against human pathogens in murine models<sup>7</sup>. Among them, bacteriophage T4 was engineered by  
49 grafting Ags to the capsid surface or by modifying the phage genome to deliver DNA encoding Ags  
50 from *Y. pestis*<sup>8</sup> or more recently SARS-CoV-2<sup>9</sup>. While infectious phages are often easier to produce  
51 than their genome-free capsid, their use as vaccines in human clinical trials is confronted to  
52 international regulatory issues posed by the use of self-replicating viruses in medicine, as is currently  
53 the case with phage therapy<sup>10</sup>. In contrast, phage capsids devoid of viral genome could meet  
54 regulatory requirements applicable to VLPs. VLPs derived from RNA phages self-assemble upon  
55 expression of the gene encoding their coat protein (CP). The CP can tolerate the genetic fusion of Ag  
56 to its N- or C-terminal ends or insertion in external unstructured loops<sup>11</sup>. However, the self-assembly  
57 of Ag-VLP based on genetic fusion is limited to relatively small Ags (< 50 amino acids)<sup>12</sup>, or can be  
58 achieved if only a small proportion of CP subunits bears larger Ags<sup>13</sup>. Chemical crosslinking or bio-

59 conjugation technologies, like SpyTag/SpyCatcher conjugation that creates a covalent iso-peptide  
60 bond between pre-purified VLPs and Ags, were used to overcome this limitation. However the Ag-  
61 coupling efficiency is highly variable and difficult to control, ranging from 20 to 80 % depending on  
62 the Ag<sup>14,15</sup>. Capsid decoration proteins that are found in some tailed bacteriophages constitute an  
63 attractive alternative to conjugation methods. These proteins spontaneously attach to their specific  
64 sites onto the mature capsid once the genome has been packaged and represent potential home  
65 bases for Ag display. The decoration protein gpD of phage lambda, which binds as trimer spikes to  
66 the three-fold axes of the capsid, was genetically or chemically modified to display heterologous Ag  
67 on self-assembled VLPs derived from Lambda capsid<sup>16</sup>. Although these VLPs have proven to elicit  
68 strong humoral immune responses in mice<sup>17</sup>, the methods used for Ag grafting do not allow full Ag  
69 load. Further development of phage capsids for vaccination requires reliable scaffolds that can  
70 efficiently anchor Ags in a precise array independently of their sizes. With this in mind, we turned our  
71 interest toward the large icosahedral capsid from bacteriophage T5 (90 nm in diameter)<sup>18</sup>. The capsid  
72 shell is formed of 775 subunits of the CP (the major capsid protein pb8) organized as hexamers on  
73 the faces and pentamers on 11 of the 12 vertices<sup>19</sup>. Its outer surface displays a monomeric decoration  
74 protein pb10 (17.3 kDa) bound at the center of each of the 120 CP hexamers<sup>19</sup>. pb10 is formed of an  
75 N-terminal capsid-binding domain (pN), connected by a flexible linker to a C-terminal  
76 immunoglobulin (Ig)-like domain (pC) exposed to the solvent (**Fig. 1a**). The pN domain alone anchors  
77 with the same high affinity as full-length pb10 to its binding sites ( $K_D = 10^{-12}$  M), while the pC domain  
78 does not interact with the capsid<sup>20</sup>. These properties suggest that pC could be swapped for a  
79 heterologous protein while keeping the interaction of pN with the capsid. Capsids of dsDNA  
80 bacteriophages initially assemble into compact procapsids, which undergo expansion upon genome  
81 packaging. This structural rearrangement of capsid protein subunits yields mature particles capable  
82 of withstanding the internal pressure generated by the packed dsDNA. T5 constitutes a particularly

83 attractive system as stable empty capsids devoid of viral DNA and of decoration protein can be  
84 purified from bacteria infected with a T5 phage mutant impaired in DNA packaging. These empty  
85 capsids can be matured in their stable expanded conformation and decorated *in vitro* with  
86 pb10<sup>20,21</sup>. Based on the properties of these T5 capsid-like particles (CLPs), we evaluated here their  
87 potential as multivalent vaccine platforms. Chimeric proteins composed of pb10 fused to the model  
88 Ag ovalbumin (Ova) were shown to retain high-affinity for T5 capsid, thus allowing the self-assembly  
89 of a nanoparticle displaying numerous Ag copies. Immunization of mice injected with these  
90 nanoparticles elicited robust humoral and cellular immune responses, compared to immunization  
91 with the chimeric protein alone. Our results establish the potency of T5-derived CLPs to serve as a  
92 vaccination platform without the need for extrinsic adjuvant.

93

## 94 RESULTS

### 95 Protein anchoring onto bacteriophage T5 CLPs with picomolar affinity

96 To assess the potential of T5 CLPs as a protein display nanoparticle, we took advantage of the  
97 anchoring domain pN of the decoration protein pb10 (**Fig. 1a**)<sup>20</sup>. We engineered chimeric proteins  
98 formed of full-length pb10 (p) or its pN domain alone fused at their C-terminal end with a  
99 heterologous protein: either the fluorescent protein mCherry (mC, 26.8 kDa) yielding pmC and pNmC  
100 chimeras or the model Ag Ova (42.8 kDa) to form pO and pNO chimeras (**Fig. 1b**). One additional  
101 construct pCO, formed of pC domain fused to Ova, was used as a negative control for capsid  
102 decoration, as pC domain does not bind to T5 capsid<sup>20</sup>. The expression of all fusion genes in *E. coli*  
103 yielded soluble monomeric proteins that were purified successively by affinity, ion exchange and size  
104 exclusion chromatography as detailed in the Methods section. Protein purity was assessed by SDS-  
105 PAGE analysis (**Supplementary Fig. 1**). Binding of pb10 chimeras to T5 CLPs was first assessed by  
106 Surface Plasmon Resonance (SPR). T5 CLPs were non-covalently captured on a SPR sensor chip  
107 through anti-capsid antibodies as previously described<sup>20</sup>, and then association and dissociation of

108 pmC, pNmC, pO and pNO were monitored at protein concentrations ranging from 0.25 to 2.5 or 4.0  
109 nM. The SPR real-time profiles of association (200s) and dissociation (600s) of pb10 and its chimeras  
110 are shown in **Fig. 1c-d**. As observed for the control protein pb10, association of pmC and pNmC (**Fig.**  
111 **1c**) or of pO and pNO (**Fig. 1d**) with T5 CLPs is fast, while dissociation is remarkably slow, suggesting  
112 a quasi-irreversible binding. From the determination of the association and dissociation rate  
113 constants  $k_{on}$  and  $k_{off}$  we calculated the dissociation equilibrium constants ( $K_D$ ) of  $0.9 - 2.3 \times 10^{-12}$  M  
114 for the chimeric proteins, very comparable to pb10  $K_D$  ( $1.5 - 2.3 \times 10^{-12}$  M). These values demonstrate  
115 that modification of the C-terminus of pb10 does not modify the huge affinity of the pN domain for  
116 the capsid, opening the possibility of modifying the pC domain without affecting the capsid  
117 decoration process. Binding of each pb10 chimera to T5 CLPs was also assessed by mobility shift  
118 assays in native agarose gel electrophoresis (**Fig. 1e**). CLPs appeared fully decorated with pmC, pNmC,  
119 pO and pNO proteins for a [protein]/[binding site] molar ratio in the range 1-1.5, as observed for  
120 unmodified pb10, attesting that the pN domain retains its high affinity for T5 CLP during  
121 electrophoresis, regardless of the protein linked to its C-terminal end. As expected, pCO protein did  
122 not modify T5 CLP mobility, showing that the fusion of pC with Ova Ag does not lead to unspecific  
123 binding to T5 CLP. The successful decoration of CLPs with chimeras formed of two different proteins,  
124 mCherry and ovalbumin, suggests that pb10 or pN can accommodate fusion with Ags of different  
125 sizes while maintaining their ability to irreversibly bind capsids.

126 We checked the integrity of the CLPs associated with pNO by cryo-electron microscopy (cryo-EM)  
127 coupled to image analysis. Representative images of T5 CLPs decorated with pNO are shown in **Fig.**  
128 **2a**. Some globular extra densities are visible and decorating the surface of the capsid. They become  
129 more visible in the three-dimensional reconstruction obtained from the images. As observed for the  
130 wild-type T5 capsid structure decorated with native pb10<sup>19</sup> (EMD-60MC) (**Fig. 1a**) the pN domain is  
131 visible at low and medium contour levels (**Fig. 2b-c**, left, middle) confirming that all of the pb10

132 binding sites are occupied. In contrast to the wild-type T5 capsid structure, for which the pC domain  
133 of pb10 is too small and too flexible to be rendered (**Fig. 1a** and reference 19), increasing the contour  
134 level for the CLP decorated with pNO revealed some smeared densities on top of pN (**Fig. 2b-c**, right).  
135 These densities can without any doubt be attributed to Ova. The fact that Ova is fuzzy is due to the  
136 flexibility of the linker between pN and Ova, a behaviour also observed for Ags bound on the  
137 ADDOMER particle<sup>22</sup>. Together with the previous biochemical and kinetic analysis, cryo-EM data  
138 attests for the complete and high affinity decoration of T5 capsids with pb10 chimeras.

### 139 **Humoral immune responses induced by CLP-bound pb10-Ova chimeras**

140 Seeking to harness T5 capsid as a vaccination platform, we investigated whether anchoring of pO or  
141 pNO onto T5 CLP could modulate their immunogenicity following their administration to mice. We  
142 first checked that the endotoxin content of pb10-Ova chimeric proteins (pO and pNO) and CLP  
143 samples was in the range (20 to 200 EU/mL) acceptable for vaccine formulation<sup>23</sup> (**Supplementary**  
144 **Table 2**). Then, C57BL/6 mice were subcutaneously injected with pO- or pNO-decorated CLPs or with  
145 pO or pNO proteins mixed or not with complete Freund adjuvant (CFA). Sera were collected every  
146 two weeks after administration and anti-Ova antibodies (Abs) were quantified by ELISA (**Fig. 3**). The  
147 level of anti-Ova Ab (IgG) was 1000-fold higher in mice injected with either CLP-bound pb10-Ova  
148 chimeras than in mice injected with pO or pNO proteins alone. This higher titer in anti-Ova Abs was  
149 observed as soon as 14 days post-injection (p.i.) and was maintained up to 6 months (192 days p.i.).  
150 Of note, this stronger humoral immune response was observed for both pO- and pNO-CLP, suggesting  
151 that the pC domain does not impact the production of anti-Ova Abs. Remarkably, the levels of anti-  
152 Ova Abs were similar in mice injected with pO- or pNO-CLP and in mice injected with pO mixed with  
153 CFA, a compound well-known for its adjuvant properties<sup>24</sup>. In order to assess the quality of anti-Ova  
154 Ab responses we identified the nature of the isotypes produced at the peak of the response (day 42  
155 p.i., **Fig. 4**). A strong production of anti-Ova Abs ( $p < 0.001$  compared to mice injected with pO or pNO

156 alone) was observed for all isotypes analysed (IgG1, IgG2b, IgG2c and IgG3) in mice injected with CLP-  
157 bound pO or pNO. The comparison with mice injected with pO supplemented with CFA uncovered a  
158 bias towards a lower production of IgG1 ( $p < 0.001$ ) and a higher production of IgG3 ( $p < 0.05$ ).  
159 These data show that the binding of multiple copies of pb10-Ova chimeras to T5 CLP elicits strong  
160 and long-lasting anti-Ova humoral responses, involving a large panel of isotypes. Furthermore, since  
161 no specific adjuvant was added in the vaccine preparation, our results suggest that T5 capsid *per se*  
162 provides an adjuvant effect and influences the nature of Ova-specific Ab responses.

163

#### 164 **Anchoring of pb10-Ova chimeras to T5 CLP is key in mounting humoral immune responses**

165 To examine whether the attachment of the chimeric proteins to T5 CLP is mandatory to mount  
166 efficient immune responses, we used pNO and pCO chimeras, which are proficient and deficient for  
167 capsid binding, respectively (see **Fig. 1**). C57BL/6 mice were immunized subcutaneously with pNO or  
168 pCO either alone, or combined with T5 CLP, or combined with CFA. Sera were collected at different  
169 time points. As reported above, the combination of pNO with T5 CLP led to a kinetic of anti-Ova  
170 humoral responses very similar to the combination of pNO with CFA and strongly different from pNO  
171 alone (**Fig. 5a**). In sharp contrast, no significant difference in the response was observed whether  
172 pCO was injected alone or with T5 CLP as shown by the measurement of total IgGs (**Fig. 5b**) and  
173 specific isotypes (**Supplementary Fig. 2**). The weak Ab response observed with pCO mixed with  
174 capsids (pCO + CLP) did not stem from a lack of pCO immunogenicity since the combination of pCO  
175 and CFA triggered strong humoral responses (**Fig. 5b and supplementary Fig. 2**). Altogether, these  
176 results indicate that binding of pb10-Ova chimeras to T5 CLP plays a key role in eliciting anti-Ova Ab  
177 responses. This is probably due the clustering of up to 120 copies of Ag on the same particle.

178

#### 179 **Induction of strong T-cell immune responses by CLP-bound pb10-Ova chimeras**



180 In order to assess anti-Ova cellular CD8<sup>+</sup> responses elicited by administration of CLP-bound pO or  
181 pNO, splenocyte responses were quantified 10 days after boosting. ELISPOT assays showed a strong  
182 increase in IFN $\gamma$ -producing CD8<sup>+</sup> splenocytes in mice injected with pO-CLP or pNO-CLP compared to  
183 mice injected with pO or pNO alone (**Fig. 6a**,  $p < 0.001$  and  $p < 0.01$ , respectively). Moreover, no  
184 significant difference was observed between the CD8<sup>+</sup> cellular responses elicited by pO- and pNO-  
185 CLP, suggesting that the pC domain is dispensable. Remarkably, pNO-CLP led to a significantly higher  
186 production of IFN $\gamma$ -producing CD8<sup>+</sup> T cells and of IFN $\gamma$  than pNO combined with CFA (**Fig. 6b and 6c**,  
187  $p < 0.01$ ). Thus, in addition to their ability to induce strong humoral responses, T5 CLP displaying  
188 multiple copies of pb10-Ova chimeras constituted an efficient tool to trigger potent CD8<sup>+</sup> T cell  
189 responses.

190

## 191 Discussion

192 The capsid of bacteriophage T5 offers major advantages for Ag display and vaccination. The procapsid  
193 form, devoid of DNA, is easy to produce and to mature into a capsid-like particle (CLP) with the  
194 same structure, stability and affinity for the decoration protein pb10 compared to the native  
195 virion<sup>20,21</sup>. In this study, we demonstrated that the fusion of mCherry (25.8 kDa) or ovalbumin (42.8  
196 kDa) to full-length pb10 (17.3 kDa) or to its capsid binding domain pN (8.1 kDa) yielded soluble  
197 chimeric proteins retaining picomolar affinity to T5 capsid. Such quasi-infinite affinity ensures the full  
198 occupancy of capsid binding sites (120 copies) as evidenced by cryo-electron microscopy data. The  
199 easy and regular anchoring of pb10-chimeras onto T5 CLP by mere molecular recognition between  
200 pN and CLP is better controlled and more efficient than chemical or bio-conjugation technologies.  
201 These remarkable T5 CLP properties are instrumental in achieving the production of a new  
202 nanoparticle displaying large proteins, including Ags of interest.

203 We probed the vaccine properties of T5 CLPs displaying pb10-Ova chimeric proteins pO or pNO. Their  
204 administration to mice elicited long-lasting anti-Ova Ab responses as well as CD8<sup>+</sup> T cell responses. A  
205 single injection of non-adjuvanted CLPs decorated with pO or pNO was sufficient to elicit a strong  
206 production of anti-Ova Abs for more than 6 months. Remarkably, these responses were similar to the  
207 ones obtained after co-administration of pO or pNO with CFA. The characterization of Ab responses  
208 revealed the production of a large panel of isotypes (IgG1, IgG2b, IgG2C and IgG3). This suggest the  
209 capacity of Ag-decorated T5 CLP to mobilize different subpopulations of helper or/and follicular  
210 helper T cells (Th/Tfh) able to promote B-cell differentiation. The production of different isotypes is  
211 of major interest to activate different Ab effector functions such as neutralization, phagocytosis,  
212 complement activation and cell cytotoxicity<sup>25</sup>. Such large isotypic responses were not reported  
213 previously upon vaccination using bacteriophage particles, neither with the infectious bacteriophage  
214 T4 displaying Ags from *Yersinia pestis*<sup>26</sup> nor with PP7-derived VLP displaying HPV epitopes<sup>27</sup>. Beside  
215 the humoral responses, we demonstrated that CLPs displaying pb10-Ova proteins elicited a strong  
216 induction of CD8<sup>+</sup> T cell responses. In previous studies, Pouyenfard *et al.* reported that T7  
217 bacteriophages displaying a CD8<sup>+</sup> T cell epitope derived from a tumor Ag were able to trigger potent  
218 anti-epitope T cell responses<sup>28</sup>. Also, T4 bacteriophage heads (capsids filled with viral DNA) displaying  
219 an Ag from *Y. pestis* were shown to induce CD8<sup>+</sup> T cell responses<sup>29</sup>. To the best of our knowledge, this  
220 study is the first to report induction of both humoral and cellular responses by a fully-decorated  
221 capsid shell devoid of viral DNA.

222 Vaccination studies using infectious bacteriophages ( $\lambda$ <sup>30,31</sup>, PP7<sup>27</sup>, T4<sup>26</sup> or T7<sup>28</sup>) or phage heads (Q $\beta$ <sup>32</sup>  
223 or T4<sup>29</sup> containing RNA or DNA respectively) reported the induction of immune responses in the  
224 absence of adjuvant. Similarly, complexes between T5 CLP and pb10-Ova chimeras triggered potent  
225 humoral and cellular responses in absence of any extrinsic adjuvant. As T5 CLP preparations contain  
226 low amounts of endotoxin, our results suggest that T5 capsid shell alone, in the absence of phage

227 genome, provides the adjuvant effect required for efficient vaccination. We speculate that the capsid  
228 itself or some structural motifs might be detected by Ag-presenting cells as previously documented  
229 for different viruses<sup>33–35</sup>. The strong immunogenicity of T5 CLPs may stem also from the highly  
230 ordered and repetitive distribution of Ags (120 copies), which is known to promote the engagement  
231 of several B-cell receptors at the surface of Ag-specific B-cells<sup>1,36</sup>. This immunogenicity might also be  
232 favoured by the delivery of Ag-CLP complexes to B-cell follicles within secondary lymphoid organs, as  
233 reported for VLPs derived from other bacteriophages<sup>37</sup>.

234 This study paves the way for the development of T5 CLP-based nanoparticles as a new platform for  
235 Ag delivery. Their attractiveness relies on several key features: (i) the tremendous thermal stability  
236 of T5 CLPs, which resists temperatures up to 95°C<sup>21</sup>; (ii) the easiness and low-cost of their large scale  
237 production in *E. coli* cells; (iii) the intrinsic adjuvant properties of T5 CLPs, (iv) the capacity of the  
238 decoration protein pb10 or its pN domain alone to tolerate the fusion with large size Ags and finally  
239 (v) the well-controlled and highly efficient anchoring of a high copy number of the displayed Ag.  
240 Further investigations will establish the potential of this platform to protect against different  
241 pathogens.

242

243

**Fig. 1**

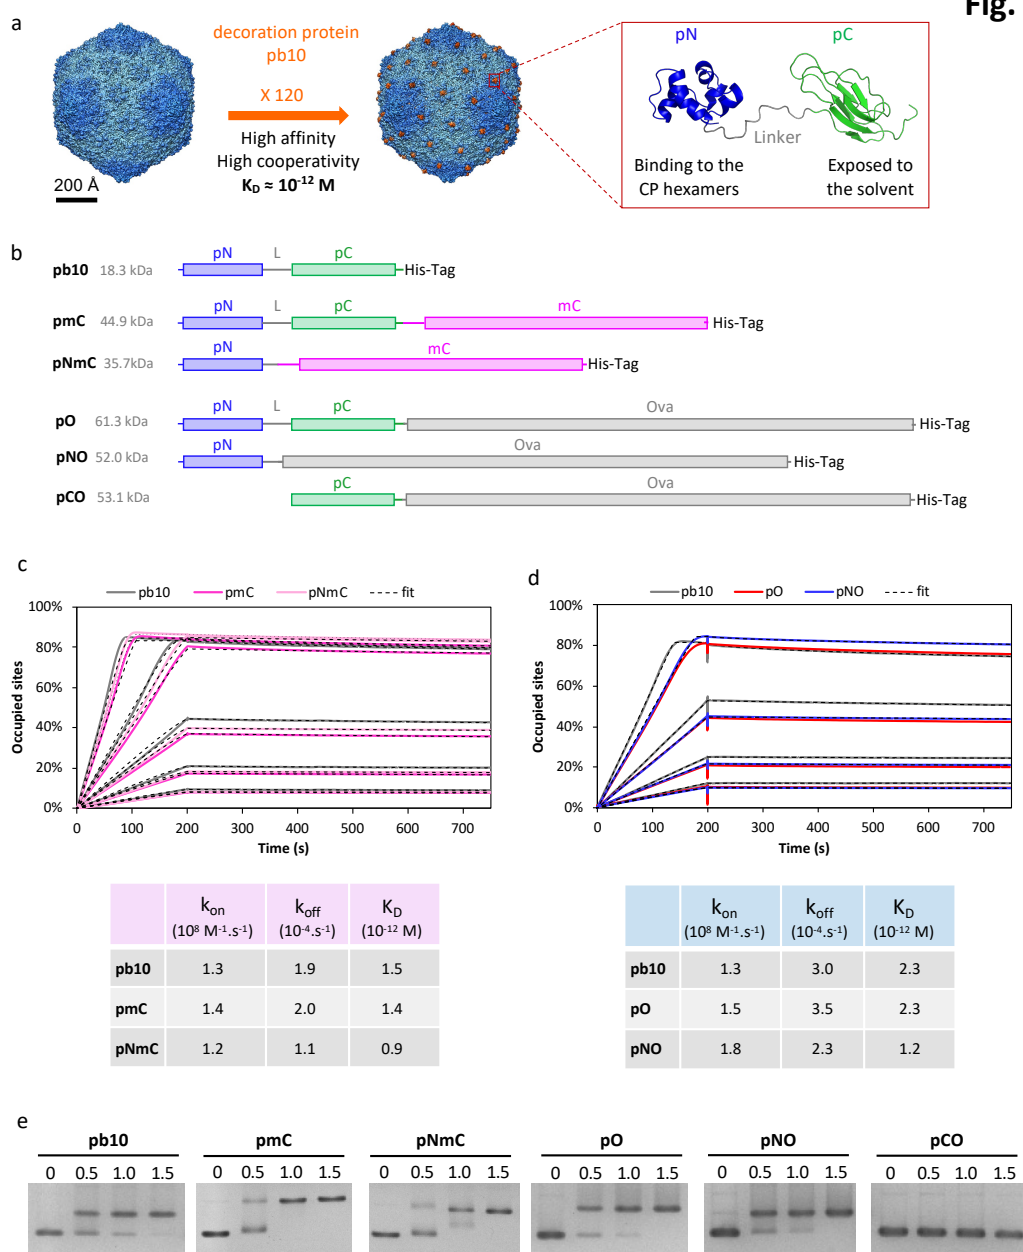

244  
245 **Fig. 1: Anchoring of pb10-chimeras onto T5 CLPs with picomolar affinity.** (a) High-affinity decoration of T5 capsid  
246 with 120 copies of the protein pb10, as seen on the surface view of T5 capsid density maps (represented from EMDB  
247 accession codes 6OMA and 6OMC). The backbone structure of pb10 shows the capsid anchoring N-terminal domain  
248 pN (blue, PDB code 5LXL) and the C-terminal domain pC (green, PDB code 5LXK). (b) Schematic representation of  
249 pb10-chimeras pmC, pNmC, pO, pNO and pCO used in this study, with reference to the native protein pb10. The N-  
250 terminal (pN) and C-terminal (pC) domains of pb10 are in blue and green respectively. L is the linker region between  
251 pN and pC domains. The fused heterologous proteins mCherry (mC) and Ovalbumin (O) are in pink and grey  
252 respectively. The lines represent the unfolded flexible regions while the rectangles represent the structured  
253 domains of each protein. (c-d) SPR real-time profiles of association with T5 CLPs (0 to 200 s) and of dissociation (200  
254 to 750 s) using pb10 chimeras at increasing concentrations: 0.25, 0.5, 1.0, 2.0 and 4.0 nM for pb10-mC (c); 0.3, 0.6,  
255 1.25, 2.5 nM for pb10-Ova (d). SPR response is expressed as the percentage of occupied binding-sites on the CLP,  
256 in order to cope with the mass difference of the pb10 chimeras. Below the graphs are the association and  
257 dissociation rate constants  $k_{on}$  and  $k_{off}$  calculated from the SPR profiles and the resulting dissociation equilibrium  
258 constants ( $K_D$ ). The fitting method used for the determination of these constants is described in the Methods,  
259 according to the reference<sup>20</sup>. (e) Binding assays of pb10 and chimeras to T5 CLPs analyzed by native agarose gel  
260 electrophoresis. The [pb10]/[binding site] molar ratio indicated above each lane was calculated as described in the  
261 Methods.

Fig. 2

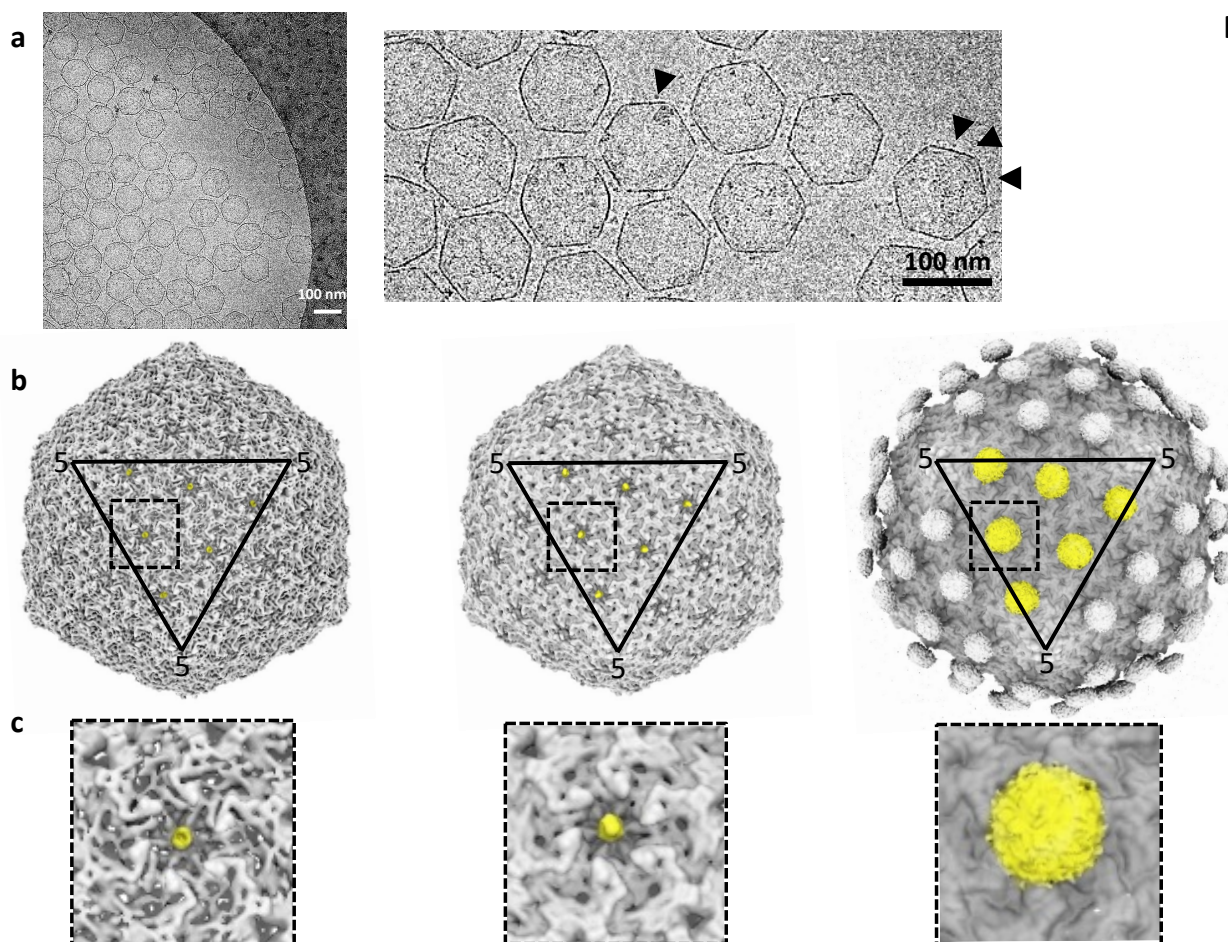

262

263 **Fig. 2: Cryo-EM image analysis and three-dimensional reconstruction of T5 CLPs decorated with pNO.** (a)  
 264 Representative example of a cryo-electron microscopy image (left) and enlarged view (right). The arrowheads  
 265 indicate the presence of Ova at the surface of the CLPs. The scale bars represent 100 nm. (b) Isosurface  
 266 representation of the 3D structure of T5 CLP decorated with pNO at low (left), medium (middle) and high (right)  
 267 contour levels. One facet is highlighted by a triangle, the number 5 indicates CP pentamers at the vertices. (c)  
 268 Enlarged views of the different squares highlighted in b and centered on a CP hexamer. Left: low contour level  
 269 isosurface representation of pNO 3D structure. Even at low contour level the pN is visible (highlighted in yellow)  
 270 showing that pNO occupies nearly if not 100% of the available sites in the center of hexamers. Middle: medium  
 271 contour level isosurface representation of pNO 3D structure. The pN domain (yellow) is clearly visible. Right: high  
 272 contour level isosurface representation of pNO 3D structure. On top of each pN domain an extra density becomes  
 273 visible, which can unambiguously be attributed to Ova. The Ova density is smeared because of the presence of a  
 274 flexible linker between pN and Ova: different positions of Ova are averaged out in the 3D structure.  
 275

Fig. 3

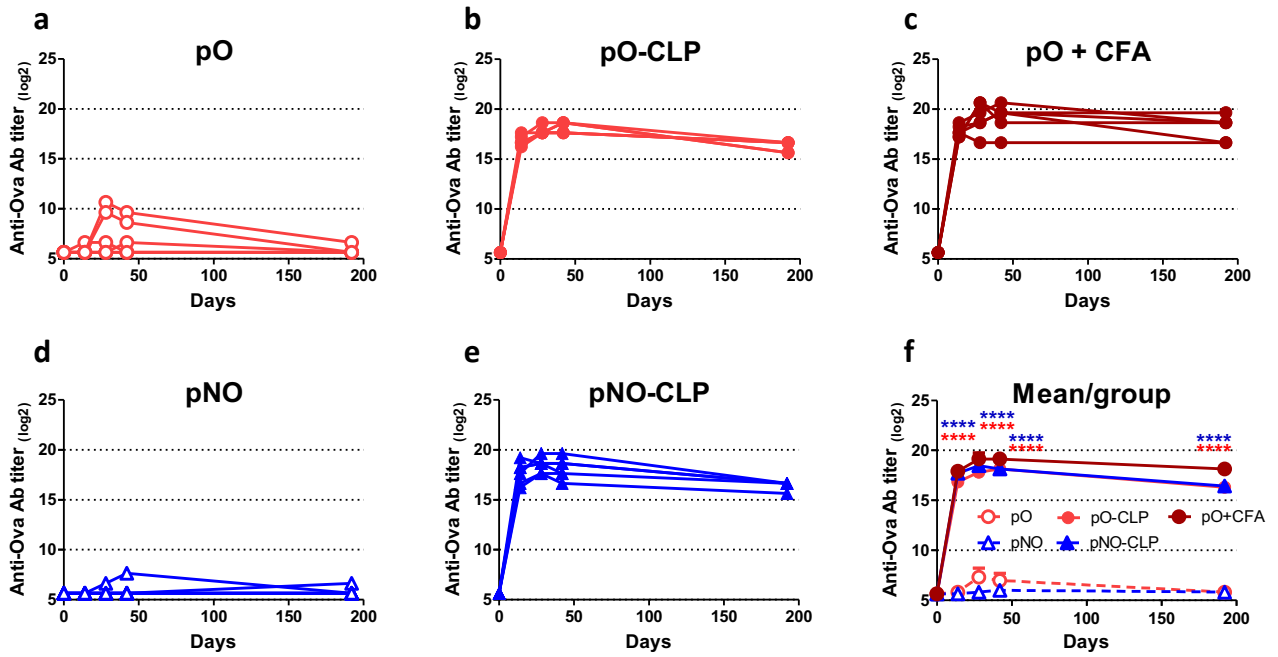

276

277 **Fig. 3. Kinetic of anti-Ova humoral immune responses elicited by pb10-Ova chimeras.** C57BL/6 mice were  
 278 immunized subcutaneously with pb10-Ova chimeras alone (pO or pNO), bound to T5 CLP (pO-CLP or pNO-CLP) or  
 279 supplemented with CFA (pO + CFA). Titers of Ova-specific IgG were determined by ELISA at different time points  
 280 after injection. (a-e) Each curve represents titers (log<sub>2</sub> scale) of individual mice (n = 6) of the indicated group. (f)  
 281 Comparison of the kinetics of the different groups (mean + SEM). Titers below 100 were plotted as log<sub>2</sub>(50). \*\*\*\*,  
 282 *p* < 0.0001 versus pO alone (red) or pNO alone (blue).  
 283

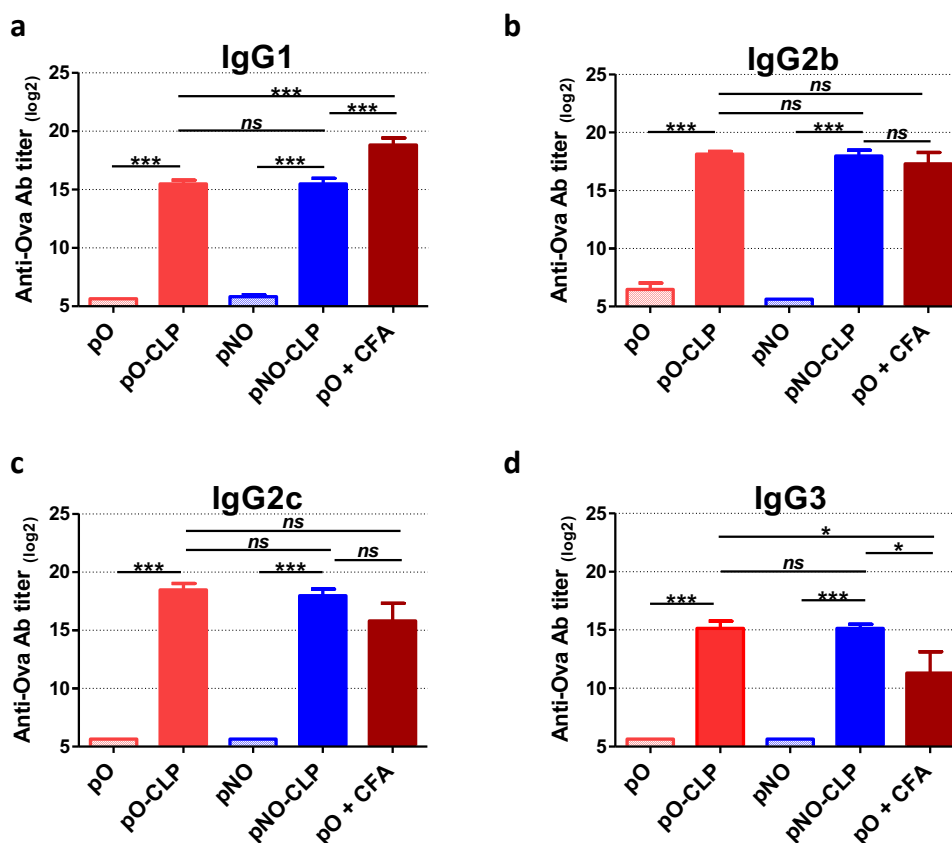

Fig. 4

285  
286  
287  
288  
289  
290  
291

**Fig. 4. Nature of the anti-Ova humoral immune responses elicited by pb10-Ova chimeras.** Mice were immunized subcutaneously with pb10-Ova chimeras alone (pO or pNO), bound to T5 CLP (pO-CLP or pNO-CLP) or supplemented with CFA (pO + CFA). Titers of anti-Ova Abs of IgG1 (a), IgG2b (b), IgG2c (c) and IgG3 (d) isotypes were determined by ELISA at day 42 p.i. The results correspond to the mean + SEM of each group (n = 6, log<sub>2</sub> scale). Titers below 100 were plotted as log<sub>2</sub>(50). ns, non-significant; \*,  $p < 0.05$ ; \*\*,  $p < 0.01$ ; \*\*\*,  $p < 0.001$ .

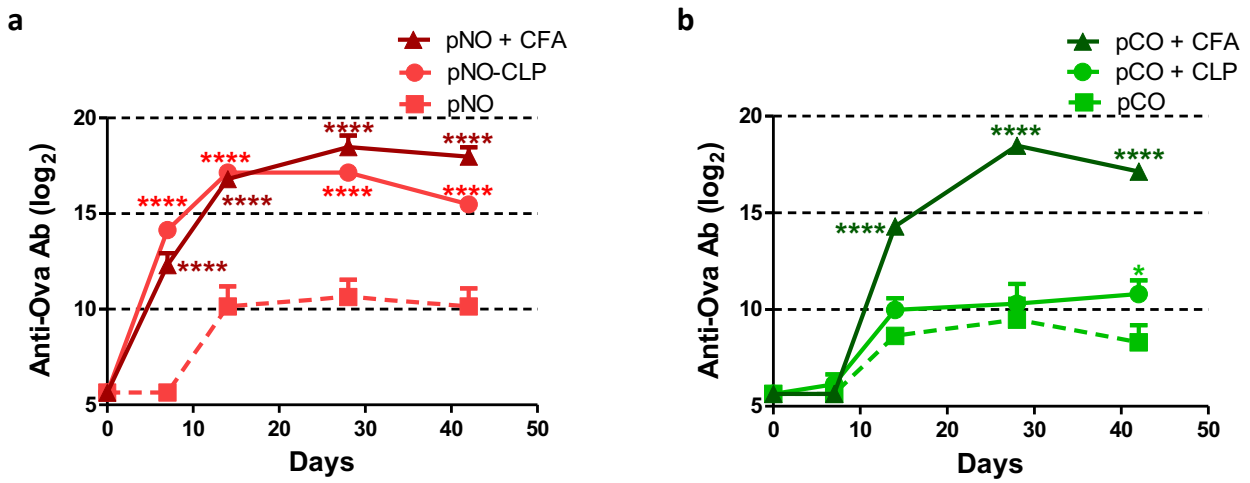

292  
293  
294  
295  
296  
297  
298  
299

**Fig. 5. Kinetic of anti-Ova humoral immune responses elicited by Ova fused to pN or pC domains of pb10.** C57BL/6 mice were immunized subcutaneously with pb10-Ova chimeras (**a**, pNO ; **b**, pCO) alone or combined with either T5 CLP (pNO-CLP, pCO + CLP) or CFA (pNO + CFA, pCO + CFA). Titers of Ova-specific IgGs were determined by ELISA at different time points after injection. The results correspond to means + SEM of data of individual mice (n = 6, log<sub>2</sub> scale). Titers below 100 were plotted as log<sub>2</sub>(50). \*, *p* < 0.05 and \*\*\*\*, *p* < 0.0001 versus pNO or pCO alone.



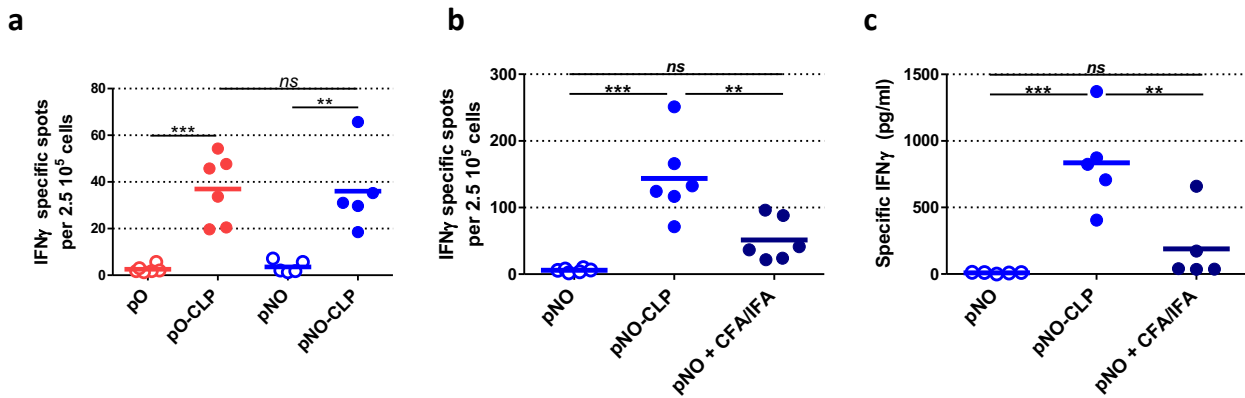

300  
301  
302  
303  
304  
305  
306  
307  
308  
309

**Fig. 6. Cellular immune responses elicited by pb10-Ova chimeras.** Mice were immunized (priming) with chimeric proteins either alone (pO, pNO), or bound to T5 CLP (pO-CLP, pNO-CLP) or supplemented with CFA. Mice were subsequently boosted under the same conditions (except that CFA was replaced by incomplete Freund adjuvant, ICF). **(a-b)** IFN $\gamma$ -producing splenocytes were quantified by ELISPOT and **(c)** IFN $\gamma$  production by splenocytes was measured by ELISA after *in vitro* restimulation with Ova<sub>257-264</sub> peptide 10 days after boosting. The interval between priming and boosting was of two **(a)** or six months **(b)**. The bars correspond to the mean of each group (n = 5-6) and the circles to results of individual mice. *ns*, non-significant; \*\*,  $p < 0.01$ ; \*\*\*,  $p < 0.001$ .

310 **References**

- 311 1. Bachmann, M. F. & Jennings, G. T. Vaccine delivery: a matter of size, geometry, kinetics and  
312 molecular patterns. *Nat Rev Immunol* **10**, 787–796 (2010).
- 313 2. Mohsen, M., Gomes, A., Vogel, M. & Bachmann, M. Interaction of Viral Capsid-Derived  
314 Virus-Like Particles (VLPs) with the Innate Immune System. *Vaccines* **6**, 37 (2018).
- 315 3. Kelly, H. G., Kent, S. J. & Wheatley, A. K. Immunological basis for enhanced immunity of  
316 nanoparticle vaccines. *nurl* **18**, 269–280 (2019).
- 317 4. Schiller, J. & Lowy, D. Explanations for the high potency of HPV prophylactic vaccines.  
318 *Vaccine* **36**, 4768–4773 (2018).
- 319 5. Tornesello, A. L., Tagliamonte, M., Buonaguro, F. M., Tornesello, M. L. & Buonaguro, L. Virus-  
320 like Particles as Preventive and Therapeutic Cancer Vaccines. *Vaccines (Basel)* **10**, 227 (2022).
- 321 6. de Vries, C. R. *et al.* Phages in vaccine design and immunity; mechanisms and mysteries. *Curr*  
322 *Opin Biotechnol* **68**, 160–165 (2021).
- 323 7. González-Mora, A., Hernández-Pérez, J., Iqbal, H. M. N., Rito-Palomares, M. & Benavides, J.  
324 Bacteriophage-Based Vaccines: A Potent Approach for Antigen Delivery. *Vaccines (Basel)* **8**, E504  
325 (2020).
- 326 8. Tao, P. *et al.* In vitro and in vivo delivery of genes and proteins using the bacteriophage T4  
327 DNA packaging machine. *Proc. Natl. Acad. Sci. U.S.A.* **110**, 5846–5851 (2013).
- 328 9. Zhu, J. *et al.* A universal bacteriophage T4 nanoparticle platform to design multiplex SARS-  
329 CoV-2 vaccine candidates by CRISPR engineering. *Sci Adv* **7**, eabh1547 (2021).
- 330 10. Fauconnier, A. Phage Therapy Regulation: From Night to Dawn. *Viruses* **11**, 352 (2019).
- 331 11. Peabody, D. S., Peabody, J., Bradfute, S. B. & Chackerian, B. RNA Phage VLP-Based Vaccine  
332 Platforms. *Pharmaceuticals (Basel)* **14**, 764 (2021).
- 333 12. Pumpens, P. *et al.* The True Story and Advantages of RNA Phage Capsids as Nanotools.  
334 *Intervirolgy* **59**, 74–110 (2016).
- 335 13. Cielens, I. *et al.* Mosaic RNA Phage VLPs Carrying Domain III of the West Nile Virus E Protein.  
336 *Mol Biotechnol* **56**, 459–469 (2014).
- 337 14. Thrane, S. *et al.* Bacterial superglue enables easy development of efficient virus-like particle  
338 based vaccines. *J Nanobiotechnology* **14**, 30 (2016).
- 339 15. Fougereux, C. *et al.* Capsid-like particles decorated with the SARS-CoV-2 receptor-binding  
340 domain elicit strong virus neutralization activity. *Nat Commun* **12**, 324 (2021).
- 341 16. Chang, J. R. *et al.* Phage lambda capsids as tunable display nanoparticles. *Biomacromolecules*  
342 **15**, 4410–4419 (2014).
- 343 17. Davenport, B. J. *et al.* Phage-like particle vaccines are highly immunogenic and protect  
344 against pathogenic coronavirus infection and disease. *npj Vaccines* **7**, 57 (2022).
- 345 18. Zivanovic, Y. *et al.* Insights into bacteriophage T5 structure from analysis of its  
346 morphogenesis genes and protein components. *J Virol* **88**, 1162–1174 (2014).
- 347 19. Huet, A., Duda, R. L., Boulanger, P. & Conway, J. F. Capsid expansion of bacteriophage T5  
348 revealed by high resolution cryoelectron microscopy. *Proc Natl Acad Sci U S A* **116**, 21037–21046  
349 (2019).
- 350 20. Vernhes, E. *et al.* High affinity anchoring of the decoration protein pb10 onto the  
351 bacteriophage T5 capsid. *Sci Rep* **7**, 41662 (2017).
- 352 21. Preux, O. *et al.* A two-state cooperative expansion converts the procapsid shell of  
353 bacteriophage T5 into a highly stable capsid isomorphous to the final virion head. *J Mol Biol* **425**,  
354 1999–2014 (2013).
- 355 22. Chevillard, C. *et al.* Elicitation of potent SARS-CoV-2 neutralizing antibody responses through  
356 immunization with a versatile adenovirus-inspired multimerization platform. *Mol Ther* S1525-

0016(22)00094–6 (2022) doi:10.1016/j.ymthe.2022.02.011.

23. Brito, L. A. & Singh, M. Acceptable levels of endotoxin in vaccine formulations during preclinical research. *J Pharm Sci* **100**, 34–37 (2011).

24. Bennett, B., Check, I. J., Olsen, M. R. & Hunter, R. L. A comparison of commercially available adjuvants for use in research. *Journal of Immunological Methods* **153**, 31–40 (1992).

25. Lu, L. L., Suscovich, T. J., Fortune, S. M. & Alter, G. Beyond binding: antibody effector functions in infectious diseases. *Nat Rev Immunol* **18**, 46–61 (2018).

26. Tao, P. *et al.* Mutated and bacteriophage T4 nanoparticle arrayed F1-V immunogens from *Yersinia pestis* as next generation plague vaccines. *PLoS Pathog* **9**, e1003495 (2013).

27. Tumban, E., Peabody, J., Peabody, D. S. & Chackerian, B. A universal virus-like particle-based vaccine for human papillomavirus: longevity of protection and role of endogenous and exogenous adjuvants. *Vaccine* **31**, 4647–4654 (2013).

28. Pouyanfard, S., Bamdad, T., Hashemi, H., Bandehpour, M. & Kazemi, B. Induction of Protective Anti-CTL Epitope Responses against HER-2-Positive Breast Cancer Based on Multivalent T7 Phage Nanoparticles. *PLoS ONE* **7**, e49539 (2012).

29. Tao, P. *et al.* In vitro and in vivo delivery of genes and proteins using the bacteriophage T4 DNA packaging machine. *Proceedings of the National Academy of Sciences* **110**, 5846–5851 (2013).

30. Gamage, L. N. A., Ellis, J. & Hayes, S. Immunogenicity of bacteriophage lambda particles displaying porcine Circovirus 2 (PCV2) capsid protein epitopes. *Vaccine* **27**, 6595–6604 (2009).

31. González-Cano, P. *et al.* Lambda display phage as a mucosal vaccine delivery vehicle for peptide antigens. *Vaccine* **35**, 7256–7263 (2017).

32. Khan, F. *et al.* Head-to-Head Comparison of Soluble vs. Q $\beta$  VLP Circumsporozoite Protein Vaccines Reveals Selective Enhancement of NANP Repeat Responses. *PLoS One* **10**, e0142035 (2015).

33. Shepardson, K. M. *et al.* Induction of Antiviral Immune Response through Recognition of the Repeating Subunit Pattern of Viral Capsids Is Toll-Like Receptor 2 Dependent. *mBio* **8**, e01356-17 (2017).

34. Gogokhia, L. *et al.* Expansion of Bacteriophages Is Linked to Aggravated Intestinal Inflammation and Colitis. *Cell Host Microbe* **25**, 285-299.e8 (2019).

35. Hösel, M. *et al.* Toll-like receptor 2-mediated innate immune response in human nonparenchymal liver cells toward adeno-associated viral vectors. *Hepatology* **55**, 287–297 (2012).

36. Kelly, H. G. *et al.* Self-assembling influenza nanoparticle vaccines drive extended germinal center activity and memory B cell maturation. *JCI Insight* **5**, e136653 (2020).

37. Link, A. *et al.* Innate immunity mediates follicular transport of particulate but not soluble protein antigen. *J Immunol* **188**, 3724–3733 (2012).

38. Li, C. *et al.* FastCloning: a highly simplified, purification-free, sequence- and ligation-independent PCR cloning method. *BMC Biotechnol* **11**, 1–10 (2011).

39. Engler, C., Gruetzner, R., Kandzia, R. & Marillonnet, S. Golden Gate Shuffling: A One-Pot DNA Shuffling Method Based on Type IIs Restriction Enzymes. *PLOS ONE* **4**, e5553 (2009).

40. Gasteiger, E. *et al.* Protein Identification and Analysis Tools on the ExPASy Server. in *The Proteomics Protocols Handbook* (ed. Walker, J. M.) 571–607 (Humana Press, 2005). doi:10.1385/1-59259-890-0:571.

41. Dominguez-Medina, S. *et al.* Neutral mass spectrometry of virus capsids above 100 megadaltons with nanomechanical resonators. *Science* **362**, 918–922 (2018).

42. Schorb, M., Haberbosch, I., Hagen, W. J. H., Schwab, Y. & Mastrorarde, D. N. Software tools for automated transmission electron microscopy. *Nat Methods* **16**, 471–477 (2019).

43. Zivanov, J. *et al.* New tools for automated high-resolution cryo-EM structure determination in RELION-3. *eLife* **7**, e42166 (2018).

405

## 406 **Methods**

407 **Expression vectors for the production of pb10 chimeric proteins.** The coding sequence of the full-  
408 length decoration protein pb10 (GenBank accession number: AAU05286) was previously cloned into  
409 the pET28b vector in frame with a C-terminal His-Tag<sup>20</sup>. The gene encoding variants of pb10 fused in  
410 their C-terminal end with mCherry (Red fluorescent protein, GenBank accession number AAV52164)  
411 or Ova (Ovalbumin, GenBank accession number J00895) were cloned in pET28b: (i) full-length pb10  
412 for pmC and pO, (ii) the N-terminal capsid binding domain of pb10 (pN, first 73 amino-acids) for pNmC  
413 or pNO and (iii) the C-terminal domain of pb10 (pC, amino acids 74 to 164) for pCO. All constructs  
414 included a His-Tag in frame with the mCherry or Ova C-terminal end. The pET28-pmC, -pNmC, -pO  
415 and -pNO vectors were constructed using a ligation-free technology (FastCloning method according  
416 to Li et al<sup>38</sup> or with the Quick-Fusion Cloning Kit from Biotool), while pET28-pCO was constructed by  
417 using the golden-gate seamless assembly method based on the type IIS restriction endonuclease  
418 according to Engler *et al.*<sup>39</sup>. The cloning strategies and oligonucleotides used for generating these  
419 expression vectors are detailed in supplementary information and **Supplementary Table 1**  
420 respectively.

421

422 **Production and purification of pb10 chimeric proteins.** *E. coli* BL21 (DE3) cells harbouring each of  
423 the different pb10 expression vectors were grown in LB medium supplemented with 50 µg/mL  
424 kanamycin at 37°C for pmC, pNmC, and pCO or at 28°C for pO and pNO (increased solubility). At mid-  
425 exponential growth phase ( $OD_{600nm} = 0.6 - 0.8$ ), protein expression was induced by addition of 0.4  
426 mM isopropyl-β-D-thiogalactopyranoside (IPTG) and the growth continued for 2-3h. Bacterial cells  
427 harvested by centrifugation were suspended in the loading buffer (50mM Tris-HCl pH 7.4 containing  
428 1M NaCl), broken by two passages in a French press (10,000 psi) at 4 °C and centrifuged at 4 °C

429 (100,000 g, 30 min). The supernatant was incubated at 4 °C for at least 8 hours with 1% n-Octyl-β-d-  
430 Glucopyranoside (OG), a detergent used to solubilize contaminant endotoxins (Lipopolysaccharide  
431 molecules) originating from *E. coli* outer membranes. It was then loaded onto a 5 mL HisTrap™ FF  
432 column (Cytiva) pre-equilibrated in the loading buffer supplemented with 0.2% Lauryldimethylamine-  
433 N-oxide (LDAO) and connected to an ÄKTA purifying system. The pb10-mC or -Ova chimeras were  
434 eluted with a 0-1 M imidazole gradient in the presence of 0.1% LDAO and the eluted fractions were  
435 collected for further purification in the absence of detergent, by cation or anion exchange  
436 chromatography, depending on the calculated isoelectric point (pI) of the pb10 fusion proteins. Full-  
437 length pb10 (pI = 7.9) was purified on a 5 mL HiTrap SP column (Cytiva) as previously described<sup>20</sup>,  
438 while pmC (pI = 6.4), pNmC (pI = 7,0), pO (pI = 6.0), pNO (pI = 6.2) and pCO (pI = 5.4) were purified on  
439 a 5 mL HiTrap Q HP column (Cytiva) pre-equilibrated in 50 mM Tris-HCl buffer pH 8.0. The proteins  
440 were eluted with a 0-1 M NaCl gradient, concentrated on a centrifugal filter (Amicon® Ultra-4, 10 kD,  
441 Millipore) and finally purified by size exclusion chromatography on a Superdex 75 10/300 column  
442 (Cytiva) pre-equilibrated in Phosphate-Buffered Saline (PBS). Protein concentrations were  
443 determined by measuring the absorbance at 280 nm and using the theoretical extinction coefficients  
444 of 22,920 M<sup>-1</sup>cm<sup>-1</sup> for pb10, 57,300 M<sup>-1</sup>cm<sup>-1</sup> for pmC, 45,840 M<sup>-1</sup>cm<sup>-1</sup> for pNmC, 54,320 M<sup>-1</sup>cm<sup>-1</sup> for  
445 pO and 42,860 M<sup>-1</sup>cm<sup>-1</sup> for pNO and pCO determined with the online ExPASy ProtParam tool<sup>40</sup>.

446

447 **Production and purification of T5 CLPs.** In order to produce phage T5 empty capsids (CLPs) lacking  
448 pb10, we constructed the double mutant T5ΔdecstAmN5, by cross-infection of the suppressive *E. coli*  
449 strain CR63 with the mutant T5stAmN5 bearing an amber mutation in the terminase gene  
450 (production of a non-functional truncated terminase in a non-suppressive strain, thus preventing  
451 DNA packaging<sup>18</sup>) and the mutant T5Δdec deleted in the gene encoding the decoration protein pb10  
452 (see ref. <sup>20</sup> for the detailed procedure of mutant screening). T5 CLPs were produced by infection of

453 non-suppressive *E. coli* strain F with the double mutant T5 $\Delta$ decstAmN5 and purified as previously  
454 described<sup>21</sup> with some modifications in the protocol to remove contaminant endotoxins. Briefly, after  
455 precipitation of the bacterial lysate with polyethylene glycol followed by centrifugation in glycerol  
456 gradients, the fractions containing T5 empty capsids were incubated for at least 8 hours with 1% of  
457 OG detergent. Then, a first step of anion-exchange chromatography was performed on HiTrapQ HP  
458 column (Cytiva) equilibrated in 50 mM Tris buffer, pH 8.0 containing 200 mM NaCl and 0.2% LDAO.  
459 After their elution with a 0-1 M NaCl gradient, the empty capsids were dialyzed against 50 mM Tris  
460 buffer, pH 8.0 containing 200 mM NaCl without LDAO and re-injected onto the HiTrapQ HP column  
461 for a second step of purification by using the same binding and elution solutions without detergent.  
462 Transition of T5 empty capsid from their compact state to their stabilized expanded conformation  
463 (CLP) was obtained by dialysis against 50 mM Hepes buffer, pH 7.0, for 24-48 h<sup>21</sup>. CLP samples were  
464 finally dialyzed against PBS, concentrated on a centrifugal Amicon® Ultra-4 100K filter unit (Millipore)  
465 and stored at 4 °C. CLP concentration was calculated from the measurement of protein concentration  
466 as described previously<sup>20</sup>.

467

468 **Determination of endotoxin content.** Endotoxin levels in fusion protein and CLP samples used for *in*  
469 *vivo* experiments were quantified using the Pierce LAL Chromogenic Endotoxin Quantitation Kit  
470 according to manufacturer's instructions (Thermo Fisher Scientific). The results are expressed as  
471 endotoxin unit (EU) per ml.

472

473 **Surface Plasmon Resonance binding Assay.** SPR experiments were conducted at 25 °C on a T200  
474 instrument (GE Healthcare) using a CM5 sensor chip functionalized by covalent amine coupling of  
475 rabbit antibodies raised against empty T5 capsids as described in ref.<sup>20</sup>. The CLPs (0.2 mg/mL) were  
476 captured by injection at 5  $\mu$ L/min in running buffer (PBS with 0.05 % Tween 20 and 1 mg/mL BSA)

477 yielding a capsid density of about 900 RU (**Supplementary Fig. 3**). Native pb10 or its chimeric forms  
478 (diluted in running buffer to 0.25 - 4 nM) were injected for 200 s at 50  $\mu$ L/min. Running buffer was  
479 then flowed for 550 to 700 s at 50  $\mu$ L/min to monitor protein dissociation. The functionalized surface  
480 was then regenerated by 0.85 % phosphoric acid for the next cycle of CLP capture followed by protein  
481 association and dissociation. SPR sensorgrams were corrected for non-specific pb10 binding to the  
482 anti-capsid surface and for buffer effect by subtracting both pb10 responses on the functionalized  
483 surface without CLPs and buffer response on captured CLPs. Kinetic evaluation was performed by  
484 fitting the experimental curves to a simple Langmuir model using the Biacore T200 Kinetics Summary  
485 Software (version 2.0, GE Healthcare). The percentage of occupied binding sites was calculated by  
486 dividing the protein association response expressed in RU by the expected response for total capsid  
487 decoration ( $R_{100\%}$ ) determined by the following formula:  $R_{100\%} = R_{CLP} * 120 * MW_{protein} / 26,018,181$   
488 (with  $R_{CLP}$  being the captured CLP response, 120 the number of pb10 binding sites per CLP,  $MW_{protein}$   
489 the molecular weight of the pb10-chimeras and 26,018,181 Da the molecular weight of an empty  
490 capsid<sup>41</sup>).

491

492 **Binding assays assessed by native agarose gel electrophoresis.** Purified T5 CLPs were mixed with  
493 various amounts of the different pb10 constructs at a final capsid concentration of 10 nM and  
494 incubated at 4°C for 30 min. The samples were loaded on a 1.5% agarose gel in TAMg buffer (40 mM  
495 Tris-HCl, 20 mM acetic acid, 1 mM  $MgSO_4$ , pH 8.1) and migrated at 25 V overnight in a cold room. The  
496 capsid bands were stained with Coomassie blue. The molar concentration of binding sites was  
497 calculated by multiplying the capsid concentration by 120 sites per capsid.

498

499 **Cryo-EM, image analyses and 3D reconstruction.** A 3.5  $\mu$ L sample of concentrated pNO-decorated  
500 CLPs was applied to negatively glow discharged (25 mA, 40 s) R3.5/1 quantifoil copper grids

501 (Quantifoil Micro Tools). The excess of solution was blotted using a Vitrobot Mark IV (FEI) (20 °C, 100  
502 % humidity, 2 s blot-ting time and blot force 1) and subsequently flash-frozen in liquid ethane.  
503 Automated data collection was performed on a 200 kV Glacios cryo-TEM microscope (Thermo Fischer  
504 Scientific) equipped with a K2 direct electron detector (Gatan) using SerialEM<sup>42</sup>. Coma and  
505 astigmatism corrections were also performed using SerialEM. Movies of 40 frames were recorded in  
506 counting mode at a 36,000× magnification giving a pixel size of 1.145 Å with defocus ranging from  
507 -1.0 to -2.5 µm using a multi-shot scheme (3x3 grids of holes without moving the stage). Total  
508 exposure dose per movie was 40 e-/Å<sup>2</sup> and total number of images was 2500.  
509 Movie drift correction and CTF determination were performed with Relion<sup>43</sup>. A total number of  
510 12,000 T5 CLPs were automatically selected into 1024 x 1024 pixels boxes from the best 500 images.  
511 These boxes were rescaled to 420 x 420 pixels boxes (pixel size of 2.9 Å) and submitted to 2D  
512 classification. After extensive selection and generation of an initial model imposing I4 symmetry, 3D  
513 refinement generated a final reconstruction including 10,449 particles with a resolution of 5.8 Å  
514 (Fourier Shell = 0.143, not shown).

515

516 **Mouse immunization.** Six-week-old C57BL/6 female mice were purchased from Janvier (Le Genest  
517 Saint Isle, France). All mice were conditioned for at least 1 week in our animal facilities before  
518 beginning the experiments. All animal experiments were approved (authorization number 19055-  
519 2919021108472030 v3) by Ethics Committee No. 26 (officially recognized by the French Ministry for  
520 Research) in accordance with the European Directive 2010/63 UE and its transposition into French  
521 Law.

522 Recombinant fusion proteins (3.8 µM) incubated or not with T5 CLP (32 +/- 3 nM, counting as 3.8 µM  
523 of binding sites) were injected subcutaneously in a volume of 50µl of phosphate-buffered saline  
524 (PBS). For each immunization, the total amount of injected proteins was 41 µg of CLPs, decorated



525 with 11.6 µg or 9.9 µg of pO or pNO respectively, or mixed with 10.1 µg of pCO. In some experiments,  
526 a control group received injection of recombinant fusion proteins (3.8 µM) mixed with complete  
527 Freund adjuvant (CFA, Sigma) in 50 µl of PBS. Similar conditions were used when a second injection  
528 was performed, except for the control group for which recombinant fusion proteins were mixed with  
529 incomplete Freund adjuvant (IFA, Sigma). Blood samples were collected from the submandibular vein  
530 at different time points for more than 6 months and sera were prepared and analysed for the  
531 presence of specific antibodies by ELISA as described below. Spleens were collected 10 days after the  
532 second injection to monitor cellular immune responses.

533

534 **Measurement of humoral immune responses.** After coating 96-well plates (Nunc) with 1µg  
535 ovalbumin (Sigma), serial dilutions of the sera in 5% milk PBS-Tween 0.05% were added. Bound  
536 antibodies were detected with peroxidase-conjugated anti-mouse IgM, IgG, IgG1, IgG2b, IgG2c or  
537 IgG3 isotype goat Abs (Southern Biotechnology Associates). The peroxidase activity was revealed by  
538 incubation with the substrate O-phenylenediamine dihydrochloride (Sigma–Aldrich) for 30 min. The  
539 reaction was stopped by addition of 3N HCl and spectrophotometric readings were performed at 490  
540 nm. Titers were defined as the reciprocal of the highest dilution giving an OD<sub>490</sub> 2-fold above  
541 background values.

542

543 **Measurement of cellular immune responses.** Spleens were crushed in RPMI medium with 5 % foetal  
544 calf serum and  $5 \times 10^{-5}$  M β-mercaptoethanol, and filtered through a 100 µm cell strainer. After  
545 removal of blood cells by ACK Lysing Buffer (Invitrogen), the cells were resuspended and the  
546 concentration was adjusted at  $2.5 \times 10^6$  cells/mL. Then splenocytes were restimulated in different  
547 conditions (medium alone, Ova<sub>257-264</sub> peptide (5µg/mL)) in a volume of 200µL for one day (ELISPOT)  
548 or three days (ELISA). For ELISPOT, plates were revealed with supplied reagents (murine IFN<sub>γ</sub> ELISPOT

549 kit, Diaclone) and spots were counted with the ImmunoSpot® S6 FluoroSpot Line Plate Reader  
550 (C.T.L.). For ELISA, the supernatants were collected and assayed for the presence of IFN- $\gamma$  using a  
551 murine IFN- $\gamma$  kit (eBioscience). In both ELISPOT and ELISA, restimulation with ionomycin (1 $\mu$ M) and  
552 PMA (0.1 $\mu$ M) was used to control the viability of lymphocytes.

553

554 **Statistical Analysis.** Data from ELISA experiments (titers) were log<sub>2</sub>-transformed before analysis.  
555 Two-way repeated measures ANOVA was used for comparison of responses measured for different  
556 groups at different time points, then Bonferroni post hoc test was used to compare between groups  
557 at each time point. Data obtained from splenocyte restimulation assays were analyzed by a one-way  
558 ANOVA followed by Tukey's post-hoc test to compare sets of data. All graphs and statistical tests  
559 were performed using GraphPad Prism software. Differences were considered significant when  $p <$   
560  $0.05$ .

561

#### 562 **Author contributions**

563 P.B. and K.B. designed and led the study. E.V. constructed the expression vectors for most pb10-mC  
564 and -Ova chimeras, produced and purified the proteins. E.V. and M.R. purified T5 CLPs, performed  
565 the decoration assays, and prepared the samples for mice immunization. E.V. and S.H. performed the  
566 SPR experiments and analyzed the data with the help of P.E. L.R.-C. and O.R. designed the expression  
567 vector for pCO production. N.D. prepared the CLPs decorated with pNO for EM imaging, M.O.  
568 performed preliminary negative-stain and cryo-EM imaging to define the best conditions for pNO-  
569 CLP reconstructions. G.S. performed capsid imaging on the GLACIOS microscope and 3D  
570 reconstruction of pNO-CLP. L. L.C. measured endotoxin content of protein and CLP samples,  
571 performed mice immunizations, sampled blood and spleen to monitor immune responses using ELISA

572 and ELISPOT. L.Z. and N.S. performed ELISA experiments. P.B. and K.B. wrote the manuscript with  
573 contributions of E.V., O.R. and G.S. All authors reviewed the manuscript.

574

## 575 **Acknowledgements**

576 This work was supported by the Centre National de la Recherche Scientifique and the University Paris-  
577 Saclay. L. L.C., E.V. and N.D. received a fellowship from the French Ministère de l'Enseignement  
578 Supérieur et de la Recherche. L. L.C. received an additional fellowship from the Ligue Nationale contre  
579 le cancer. L.R.-C received a fellowship "Becas Don Carlos Antonio Lopez" from the Paraguayan  
580 Ministry of Education. This work benefited from the Cryo-EM platform of I2BC, supported by the  
581 French Infrastructure for Integrated Structural Biology (FRISBI) [ANR-10-INSB-05-05] and member of  
582 IBISA. This work used the platforms of the Grenoble Instruct-ERIC center (ISBG; UAR3518 CNRS-CEA-  
583 UGA-EMBL) within the Grenoble Partnership for Structural Biology (PSB), supported by FRISBI (ANR-  
584 10-INSB-05-02 & project ID 160 to P. B.) and GRAL, financed within the University Grenoble Alpes  
585 graduate school (Écoles Universitaires de Recherche) CBH-EUR-GS (ANR-17-EURE-0003). The electron  
586 microscope facility is supported by the Auvergne-Rhône-Alpes Region, the Fondation pour la  
587 Recherche Médicale (FRM), the fonds FEDER and the GIS-Infrastructures en Biologie Santé et  
588 Agronomie (IBISA). IBS acknowledges integration into the Interdisciplinary Research Institute of  
589 Grenoble (IRIG, CEA). The authors are very grateful to the staff of the animal facility of Institut  
590 Gustave Roussy for technical help. We thank Didier Poncet and Pierre Bobé for their critical reading  
591 of the manuscript.

592

## 593 **Data availability**

594 The data supporting the conclusions of the study are available from the corresponding authors. The  
595 EM map generated in this study has been deposited in the Electron Microscopy Data Bank under the  
596 number EMD-14863.

597

598 **Declaration of interests.**

599 P.B., E.V., N.D., L. L.C., and K.B are named as inventors on a patent application filed by the CNRS and  
600 University Paris-Saclay based on the presented study (N° PCT/FR2020/051628, WO2021053309).
